1 **Title:** Emergent behavioral organization in heterogeneous groups of a social insect

2

3 **Authors:** Yuko Ulrich<sup>a,b,1</sup>, Mari Kawakatsu<sup>c,1</sup>, Christopher K. Tokita<sup>d</sup>, Jonathan Saragosti<sup>a</sup>,  
4 Vikram Chandra<sup>a</sup>, Corina E. Tarnita<sup>d,2,\*</sup>, Daniel J. C. Kronauer<sup>a,2,\*</sup>

5 **Affiliations:**

6 <sup>a</sup>Laboratory of Social Evolution and Behavior, The Rockefeller University, New York, NY  
7 10065, USA

8 <sup>b</sup>Department of Ecology and Evolution, University of Lausanne, 1015 Lausanne, Switzerland

9 <sup>c</sup>Program in Applied and Computational Mathematics, Princeton University, Princeton, NJ  
10 08544, USA

11 <sup>d</sup>Department of Ecology and Evolutionary Biology, Princeton University, Princeton, NJ 08544,  
12 USA

13 <sup>1</sup>Y.U. and M.K. contributed equally to this work.

14 <sup>2</sup>C.E.T. and D.J.C.K. contributed equally to this work.

15 \*Daniel J. C. Kronauer, Corina E. Tarnita

16 **Email:** dkronauer@rockefeller.edu (D.J.C.K.), ctarnita@princeton.edu (C.E.T.)

17 Y.U. 0000-0001-9380-7863; M.K. 0000-0003-2072-6653; C.K.T. 0000-0002-8585-4317; V.C.  
18 0000-0002-8020-0664; C.E.T. 0000-0003-4476-0012; D.J.C.K. 0000-0002-4103-7729

19

20 **Classification:** Major – Biological Sciences; Minor – Evolution

21 **Keywords:** collective behavior; division of labor; self-organization; response threshold model;  
22 clonal raider ant

23 **Author Contributions**

24 YU and DJCK conceived the study. MK, CKT, and CET developed the theoretical approach. YU  
25 and DJCK designed the experiments. YU, JS, and VC performed the experiments. YU analyzed  
26 the experiments. MK and CKT performed the simulations, and MK, CKT, and CET analyzed the  
27 simulation results. MK performed analytical calculations with input from CET. YU, MK, CKT,  
28 CET, and DJCK drafted the paper, and all authors provided comments.

29 **This PDF file includes:**

30 Main Text  
31 Figures 1 to 5  
32 Table 1

### 33 **Abstract**

34 The composition of social groups has profound effects on their function, from collective decision-  
35 making to foraging efficiency. But few social systems afford sufficient control over group  
36 composition to precisely quantify its effects on individual and collective behavior. Here we  
37 combine experimental and theoretical approaches to study the effect of group composition on  
38 individual behavior and division of labor (DOL) in a social insect. Experimentally, we use  
39 automated behavioral tracking to monitor 120 colonies of the clonal raider ant, *Ooceraea biroi*,  
40 with controlled variation in three key correlates of social insect behavior: genotype, age, and  
41 morphology. We find that each of these sources of heterogeneity generates a distinct pattern of  
42 behavioral organization, including the amplification or dampening of inherent behavioral  
43 differences in colonies with mixed types. Theoretically, we use a well-studied model of DOL to  
44 explore potential mechanisms underlying the experimental findings. We find that the simplest  
45 implementation of this model, which assumes that heterogeneous individuals differ only in  
46 response thresholds, could only partially recapitulate the empirically observed patterns of  
47 behavior. However, the full spectrum of observed phenomena was recapitulated by extending the  
48 model to incorporate two factors that are biologically meaningful but theoretically rarely  
49 considered: variation among workers in task performance efficiency and among larvae in task  
50 demand. Our results thus show that different sources of heterogeneity within social groups can  
51 generate different, sometimes non-intuitive, behavioral effects, but that relatively simple models  
52 can capture these dynamics and thereby begin to elucidate the basic organizational principles of  
53 DOL in social insects.

### 54 **Significance Statement**

55 When individuals interact in an aggregate, many factors that are not known *a priori* affect group  
56 dynamics. A social group will therefore show emergent properties that cannot easily be predicted  
57 from how its members behave in isolation. This problem is exacerbated in mixed groups, where  
58 different individuals have different behavioral tendencies. Here we describe different facets of  
59 collective behavioral organization in mixed groups of the clonal raider ant, and show that a  
60 simple theoretical model can capture even non-intuitive aspects of the behavioral data. These  
61 results begin to reveal the principles underlying emergent behavioral organization in social  
62 insects. Importantly, our insights might apply to complex biological systems more generally and  
63 be used to help engineer collective behavior in artificial systems.

64 **Main Text**

65

66 **Introduction**

67

68 The study of collective behavior and self-organization is an active area of research across a  
69 diversity of fields, from animal movement (1) to robotics (2), from tissue engineering (3) to  
70 public health (4), and from voting (5) to conservation (6). The colonies of social insects in  
71 particular are striking examples of highly integrated, complex biological systems that can self-  
72 regulate without centralized control (7). Consequently, social insects have emerged as powerful  
73 systems to study collective behavior and social dynamics, both experimentally and theoretically  
74 (8–12). However, few experimental studies have comprehensively measured the influence of  
75 group composition—e.g., in age, genotype, or morphology—on collective organization, because  
76 the inherent complexity of many social insect colonies renders their composition intractable. This  
77 has limited our understanding of how colony composition affects both individual behavior and  
78 emergent group-level organization, and constitutes a major hurdle towards a general and  
79 comprehensive systems-level description of social insect colonies.

80

81 An emergent colony-level trait that has long been thought to depend on colony composition is  
82 division of labor (DOL). DOL describes the non-random variation in task performance among  
83 members of a social group (13), and is characterized both by between-individual variation and by  
84 individual specialization in task performance. Specifically, DOL has been hypothesized to  
85 increase with workforce heterogeneity, based on the observation that individual traits often  
86 correlate with individual task allocation (14). For example, workers of different age (15–18),  
87 genotype (e.g., patriline (19, 20) or matriline (21)), or morphology (e.g., size (19, 22–24)) can  
88 vary in their propensity to engage in tasks such as foraging, nursing, nest construction, or  
89 grooming of nestmates.

90

91 Experimentally testing this hypothesis in a systematic manner has proved challenging, even as  
92 theory has confirmed that workforce heterogeneity can indeed lead to the emergence of DOL (13,  
93 25). One successful theoretical approach relies on the fixed response threshold model (FTM) of  
94 task allocation (26, 27). This model assumes that each task has an associated stimulus that signals  
95 the colony demand for that task. The magnitude of a given stimulus decreases with the number,  
96 efficiency, and/or average time investment of workers performing the corresponding task.

97 Individuals respond to demands based on internal thresholds that reflect their sensitivity to the

98 stimulus and govern their likelihood of performing a task given its stimulus level: the higher the  
99 stimulus level for a task relative to an individual's threshold, the more likely it is to begin  
100 performing the task (see Materials and Methods for a detailed description). Thus, fixed thresholds  
101 provide a simple mechanism by which individuals dynamically allocate efforts to meet colony  
102 demands.

103

104 Previous work on the FTM has focused on differences in individual response thresholds as the  
105 primary driver of DOL (26, 28–32). In this simple formulation of the FTM, the heterogeneity in  
106 behavior is captured via heterogeneity in individual response thresholds drawn from a normal  
107 distribution with mean and variance that can be specific to the task and/or the type of individual.  
108 Yet, ants can also vary in other traits, for example in the efficiency with which they perform tasks  
109 (33–35) or in the average time spent performing a given task (36). Task demand can be similarly  
110 variable: for example, foraging activity levels of workers increase with the number of larvae that  
111 they have to tend to (37), and larvae of different genotypes develop into adults with different  
112 morphologies when cared for by the same workers (38). Thus, the level of demand emanating  
113 from the larvae could depend on their number and genotype. Despite this empirical evidence, few  
114 theoretical studies of DOL have explored the significance of inter-individual variation in traits  
115 other than response thresholds (14, 39).

116

117 Here we combine experimental and theoretical approaches to study the effect of group  
118 composition on both individual behavior and colony-level DOL. We use the FTM as a natural  
119 starting point, but systematically investigate a suite of parameters that might be associated with  
120 different individual traits of interest. To overcome the practical challenges associated with  
121 studying complex social systems empirically, we capitalize on the advantages of the clonal raider  
122 ant (*Ooceraea biroi*). The unique biology of this species affords unparalleled control over the  
123 main aspects of colony composition that are thought to affect individual- and group-level  
124 behavior in social insects: genotype, age, and morphology. Specifically, colonies of clonal raider  
125 ants are queenless and exclusively composed of workers that reproduce asexually and  
126 synchronously, so that all adults within a colony are genetically almost identical and emerge in  
127 discrete age cohorts. Furthermore, individuals show variation in ovariole number that is  
128 associated with body size and other morphological features (40), making it possible to  
129 approximately sort individuals into 'regular workers' (2-3 ovarioles) and 'intercastes' (4-6  
130 ovarioles) based on their size (38). Conveniently, workers of different clonal genotypes, age  
131 cohorts, and morphologies can be mixed to create functional chimeric colonies (38). Taking

132 advantage of these features, we quantify individual and collective behavior of *O. biroi* in response  
133 to precise, independent manipulations of colony composition along three independent axes, in a  
134 single system, and under standardized conditions.

135

136

## 137 **Results**

138

139 **Baseline theoretical predictions of the ‘simple’ FTM with threshold heterogeneity.** To  
140 establish baseline predictions in colonies with two types of ants (e.g., of different genotype, age,  
141 or morphology), we simulated experimental colonies using the simplest and most commonly-  
142 employed formulation of the FTM described above (see also Materials and Methods). Simulated  
143 colonies were either pure or mixed with respect to ant type; pure colonies consisted solely of one  
144 type of ant or the other, whereas mixed colonies had the two types in equal proportions. The  
145 ‘simple’ FTM assumes that the types only differ in mean response threshold. The individual  
146 thresholds for each type of ant are drawn from a normal distribution with the corresponding type-  
147 specific mean. All other model parameters—task performance efficiency, demand rate, threshold  
148 variance—are constant across types. Thus, the only source of heterogeneity in pure colonies was  
149 the distribution of individual response thresholds, while in mixed colonies that heterogeneity was  
150 compounded by differences in the means of the type-specific distributions. The assumption that  
151 some threshold heterogeneity exists even in pure colonies rests on the experimental observation  
152 that pure colonies exhibit DOL, yet in the absence of any type of heterogeneity, the FTM cannot  
153 produce DOL (32).

154

155 In pure colonies, there is a single normal distribution of individual thresholds for a given task.  
156 Because individuals from the lower end of the distribution are more sensitive to the stimulus for  
157 that task, they tended to perform that task more often than those from the higher end, resulting in  
158 DOL. In mixed colonies, there is a bimodal distribution of thresholds for each task, with the  
159 thresholds of the two types clustered around the different modes. This wider distribution of  
160 thresholds resulted in more pronounced DOL, i.e., both behavioral variation and specialization  
161 were greater in mixed colonies compared to pure colonies (Fig. 1a-b).

162

163 However, all colonies, irrespective of their composition, had the same mean task performance  
164 (Fig. 1c). This is because, while colonies may differ in how they allocate workers to tasks (in this  
165 case, within mixed colonies, the two ant types differed in their mean task performance because

166 the type with the lower average threshold for a given task took up that task more often than the  
167 other type), they must perform the same amount of work overall to satisfy a given demand. Thus,  
168 on average, colony members spent the same fraction of time performing each task across pure and  
169 mixed colonies.

170

171 In summary, the simple FTM predicted that (P1) regardless of composition, colonies would  
172 exhibit the same average task performance, but that (P2) mixed colonies would exhibit higher  
173 overall DOL and that (P3) the two types would behave differently from each other in mixed  
174 colonies, but not in their respective pure colonies (see Table 1 for a summary of predictions).

175

176 **Effects of individual genotype, age, and morphology on individual behavior in experimental**

177 **colonies.** We experimentally tested these theoretical predictions in replicate experimental  
178 colonies that were either pure or mixed with respect to genetic, demographic, and morphological  
179 composition, manipulating each factor independently from the others (see Materials and Methods,  
180 Table S1). For example, demographically pure colonies contained either only young workers (1  
181 month old) or only old workers (3 month old), and mixed colonies contained young and old  
182 workers in equal proportions; genotype and morphology were kept constant both within and  
183 between these colonies. Similarly, genetically pure colonies contained either only workers of  
184 genotype B or of genotype A (see (41) for genotype designations), and mixed colonies contained  
185 workers of the two genotypes in equal proportions; age and morphology were kept constant  
186 among these colonies. All colonies within an experiment had the same size. Colonies contained 8  
187 or 16 workers—fully functional group sizes in the clonal raider ant—and the same number of  
188 age-matched larvae hosted in a Petri dish with a plaster floor (see Materials and Methods). The  
189 experiment on genetic effects was performed twice, once with larvae of each genotype.

190

191 We used a high-throughput automated tracking system (32) to record and analyze the behavior of  
192 all individual ants in 120 experimental colonies. The propensity of each ant to perform extranidal  
193 tasks (e.g., foraging, waste disposal) as opposed to intranidal tasks (e.g., nursing) was computed  
194 as the two-dimensional root-mean-square deviation (r.m.s.d.) of its spatial coordinates (32) (Fig.  
195 2a; see Materials and Methods). The mean r.m.s.d of a group of ants was used as a proxy for their  
196 mean performance of extranidal tasks. To quantify colony-level DOL, we calculated behavioral  
197 variation and specialization among colony members. Behavioral variation was computed as the  
198 standard deviation across r.m.s.d. values of all ants from the same colony. Specialization was

199 computed as the mean correlation between individual r.m.s.d. ranks across consecutive days in  
200 the experiment (32).

201

202 We found that workers of genotype B spent more time away from the nest (i.e., had higher mean  
203 r.m.s.d.) than workers of genotype A, both across pure colonies and within mixed colonies (Fig.  
204 2b-c), suggesting a genetic basis for the propensity to perform extranidal tasks (19–21). Old  
205 workers spent more time away from the nest than young workers irrespective of colony  
206 demographic composition (Fig. 2d). Thus, *O. biroi* displays the classic form of age polyethism  
207 typical of social insects (15–18, 42), whereby older individuals allocate more time to extranidal  
208 tasks, and younger individuals spend more time at the nest. Finally, regular workers spent less  
209 time at the nest than intercastes in mixed colonies, but not across pure colonies (Fig. 2e). Because  
210 the larger body size and higher reproductive potential of intercastes correspond to a more queen-  
211 like phenotype, these behavioral differences support empirical data from other systems—  
212 including other queenless (43) and clonal (44) ant species—where reproductive potential often  
213 negatively correlates with foraging activity. Thus, consistent with existing knowledge, our  
214 experiments revealed robust differences in behavior (here, the propensity to perform extranidal  
215 tasks) across ant genotypes, age cohorts, and morphological types (Fig. 2). Interestingly,  
216 however, our experiments showed that different ant types (genotypes and age cohorts, but not  
217 morphologies) can have different mean behaviors between the corresponding two types of pure  
218 colonies. This is inconsistent with theoretical prediction (P1) that colonies, irrespective of their  
219 composition, should have the same mean behavior (Table 1).

220

221 **Effects of genetic, demographic, and morphological mixing on DOL and individual**  
222 **behavior in experimental colonies.** We found that, in general, mixed colonies had higher  
223 DOL—measured as behavioral variation (Fig. S1) and specialization (Fig. 3)—than pure  
224 colonies. Although not all pairwise comparisons were statistically significant, there was no case  
225 where pure colonies had significantly higher DOL than mixed colonies. Thus, each of the three  
226 forms of workforce heterogeneity tended to promote DOL, consistent with prediction (P2) (see  
227 Table 1).

228

229 We next assessed the outcome of mixing individuals with different behavioral tendencies on  
230 individual behavior. Consider two types of individuals, X and Y. Let  $X_k$  and  $Y_k$  be the mean  
231 behavior of types X and Y, respectively, in pure ( $k = p$ ) or mixed ( $k = m$ ) colonies. We assume  
232 that  $Y_p > X_p$  and  $Y_m > X_m$ , to reflect our observation that the type with higher r.m.s.d. in pure



233 colonies always also had higher r.m.s.d in mixed colonies. Given this assumption, mixing could,  
234 in principle, have one of three possible outcomes on individual behavior:

235

- 236 1) No effect of mixing on individual behavior: the mean behavioral difference between  
237 types across pure colonies is the same as the mean behavioral difference between types  
238 within mixed colonies, so that  $Y_p - X_p = Y_m - X_m$ .
- 239 2) Behavioral ‘contagion’: individuals of different types become behaviorally more similar  
240 on average to each other when mixed, so that  $Y_p - X_p > Y_m - X_m$ ; and
- 241 3) Behavioral ‘amplification’: individuals of different types become behaviorally more  
242 different on average from each other when mixed, so that  $Y_p - X_p < Y_m - X_m$ .

243

244 The simple FTM predicted that the two different types will differ in mean behavior when mixed,  
245 but not when in pure colonies (P3) (Fig. 1c), i.e., that behavioral amplification should always be  
246 observed. However, in contrast to this theoretical prediction, all three outcomes were observed  
247 experimentally: genetic mixing resulted in behavioral contagion (Fig. 2b-c; Student’s *t*-test:  $t =$   
248  $3.86, p = 0.002$  in colonies with A brood,  $t = 2.62, p = 0.02$  in colonies with B brood);  
249 demographic mixing had no effect on individual behavior (Fig. 2d;  $t = -1.50, p = 0.16$ ); and  
250 morphological mixing resulted in behavioral amplification (Fig. 2e;  $t = -2.44, p = 0.02$ ).

251

252 We further investigated whether mixing had an asymmetric effect on the two ant types, i.e.,  
253 whether it affected one type more than the other, so that the magnitude of change in type-specific  
254 behavior between pure and mixed colonies was different across the two ant types (i.e.  $|X_m - X_p| \neq$   
255  $|Y_m - Y_p|$ ). Testing this hypothesis, we found evidence for asymmetric behavioral contagion in  
256 genetically mixed colonies with A brood (Fig. 2b), where mixing affected the behavior of A  
257 workers (by increasing their extranidal activity) more than it affected the behavior of B workers  
258 (*t*-test  $|A_m - A_p|$  vs.  $|B_m - B_p|$ :  $t = 3.86, p = 0.0024$ ). All other scenarios studied displayed  
259 symmetric effects of mixing on individual behavior (Fig. 2c:  $|A_m - A_p|$  vs.  $|B_m - B_p|$ :  $t = -0.94, p =$   
260  $0.37$ ; Fig. 2d,  $|Young_m - Young_p|$  vs.  $|Old_m - Old_p|$ :  $t = -1.02, p = 0.33$ , Fig. 2e,  $|Regular Worker_m -$   
261  $Regular Worker_p|$  vs.  $|Intercaste_m - Intercaste_p|$ :  $t = 0.68, p = 0.50$ ).

262

263 Thus, both the direction and the magnitude of change in individual behavior between pure and  
264 mixed colonies depended on the specific source of workforce heterogeneity.

265 **Theoretical predictions of the extended FTM.** The predictions of the simple FTM only partially  
266 captured the patterns observed in the experimental colonies (Table 1). Thus, differences in mean



267 threshold alone were insufficient to explain the observed data, suggesting the need to consider  
268 other biologically realistic sources of heterogeneity in the model.

269

270 Much like assuming that types differ solely in their threshold means, assuming that types differ  
271 only in threshold variance or duration of task performance failed to capture the experimentally  
272 observed difference in mean behavior between pure colonies (Fig. S2a-b). However, between-  
273 type differences in task performance efficiency alone did reproduce this difference. In fact, if the  
274 demand was the same for both tasks, differences in task efficiency were necessary for such a  
275 pattern to emerge (SI Appendix).

276

277 When types differed only in task performance efficiency, we further found behavioral contagion  
278 in mixed colonies, i.e., the types behaved more similarly to each other when mixed. Critically, the  
279 asymmetry of this contagion depended on the magnitude of the task demand. If the task demand  
280 was not too high, so that both types could keep up with the demand in their pure colonies, then  
281 the contagion was always downward (Fig. 4a; analytical results in SI Appendix), i.e., the mixed  
282 colony, on average, behaved more like the more efficient type. If, on the other hand, the task  
283 demand was so high that the less efficient type could not keep up with task demand in its pure  
284 colony, then the contagion could, for certain parameter combinations, be upward (Fig. 4b), i.e.,  
285 the mixed colony behaved on average more like the less efficient type. Hence, if in addition to  
286 differences in task efficiency we also assumed between-type differences in task demand (to  
287 reflect possible differences in the intensity of task demand stemming from larvae of different  
288 genotypes), we were able to qualitatively recapitulate the asymmetric behavioral contagion  
289 observed in genetically mixed colonies. Holding all else fixed, differences in task efficiency  
290 guaranteed behavioral contagion; the magnitude of task demand modulated the asymmetry of this  
291 contagion, i.e., whether mixed colonies on average behaved more like the more or less efficient  
292 type.

293

294 Although the combination of between-type differences in efficiency and demand successfully  
295 recapitulated the observed behavioral contagion, it failed to capture the other observed effects of  
296 mixing on individual behavior, notably instances where mixing had no effect on behavior, or  
297 where it resulted in behavioral amplification. If we instead combined the between-type  
298 differences in task efficiency with between-type differences in mean threshold (to reflect possible  
299 between-type differences in the intrinsic propensity to perform tasks), we were able to  
300 qualitatively recapitulate both the effects of demographic mixing (no effect of mixing on type-

301 specific behavior; Fig. 4c) and the effects of morphological mixing (behavioral amplification in  
302 mixed colonies; Figs. 4d, S3). Whether we recapitulated the former or the latter depended on the  
303 magnitude of the difference in mean thresholds: a larger difference caused the types to  
304 differentiate their behavior more strongly in mixed colonies, leading to the latter; a smaller  
305 difference dampened this effect, leading to the former.

306

307 In general, the model robustly produced a spectrum of patterns, from behavioral contagion to  
308 amplification, across a large parameter space (Fig. 4e). Thus, incorporating additional,  
309 biologically realistic sources of heterogeneity into the model led to predictions that qualitatively  
310 mirrored the range of empirically observed behavioral patterns, namely: (P4) pure colonies of  
311 different ant types can differ from each other and from the mixed colonies in mean behavior, and  
312 (P5) mixing two types of ants can lead to behavioral contagion, amplification, or neither (Table  
313 1). Moreover, these extensions preserved prediction P2 (to the extent observed in the  
314 experimental data), that mixed colonies tend to have higher DOL than pure colonies (Figs. S4,  
315 S5).

316

317 **Theoretical predictions for mean task performance in non-1:1 mixes.** Despite its simplicity,  
318 the fixed threshold framework demonstrated remarkable explanatory power in both pure and  
319 mixed colonies. Given this success, we used the extended FTM to further explore expected  
320 patterns of task allocation in colonies with different ratios of ant types. We focused on the four  
321 parameter combinations in Fig. 4 because our analysis showed that they collectively captured all  
322 of the patterns observed in the experiments. For each parameter combination, we investigated  
323 how the mean task performance of colonies changed as we varied the ratio of the two ant types.

324

325 Simulations predicted a striking range of patterns. For the parameter combination that produced  
326 no effect in the mixed colonies with equal proportions of the two ant types ('1:1 mixes'), the  
327 model produced an approximately linear relationship between mean task performance and the  
328 ratio of ant types (Fig. 5a). In all other cases, the mean task performance depended nonlinearly on  
329 the ratio of the types. However, the shape of the nonlinear curve differed among the cases. In the  
330 cases corresponding to behavioral contagion in the 1:1 mixes, the relationship followed a convex  
331 decreasing function, so long as there were enough individuals of the more efficient type such that  
332 the colony could keep up with the demand (Fig. 5b; analytical results in SI Appendix); otherwise  
333 the colony performed the tasks at a fixed maximum capacity that depended only on the average  
334 task duration (Fig. 5c). In the case corresponding to behavioral amplification, the relationship

335 followed a concave decreasing function (Fig. 5d). Hence, despite one type being more efficient  
336 than the other in all cases considered, replacing an individual of the former type with one of the  
337 latter type would lead to qualitatively different outcomes depending on the between-type  
338 differences in mean threshold.

339

340 Regardless of the case studied, the ratio of the types did not alter the qualitative effect of mixing  
341 on individual behavior (behavioral contagion, amplification, or no effect); for example, the case  
342 that led to behavioral amplification in 1:1 mixes predicted behavioral amplification for all non-  
343 1:1 mixes tested (Fig. 5d).

344

345

## 346 **Discussion**

347

348 By manipulating social group composition along three different axes, we found that the effects of  
349 group heterogeneity on behavioral organization vary qualitatively depending on the specific  
350 factor under consideration. When ants of two different genotypes, ages, or morphologies were  
351 mixed, the inherent behavioral differences between each pair of types were dampened,  
352 unaffected, or amplified, respectively. The fact that various sources of heterogeneity that  
353 naturally exist in animal groups can have different, and possibly opposing, effects on collective  
354 organization underscores the importance of independently considering and controlling them. In  
355 nature, as in many experiments, all the factors studied here (larval and worker genotype, age, and  
356 morphology), as well as other effects (e.g., environmental conditions, resource availability) will  
357 play out simultaneously and in largely intractable ways. Being able to break this complexity  
358 down experimentally to study each effect separately and under standardized conditions is  
359 unprecedented and provides new insight into the basic organizing principles of behavior in social  
360 groups.

361

362 The experimental literature on DOL in social insects has historically attributed most inter-  
363 individual variation in behavior to variation in response thresholds. Our combined empirical and  
364 theoretical analyses, however, suggest that this is only part of the story. Indeed, we found that the  
365 simplest and most common implementation of the FTM, which assumes that individuals vary in  
366 response thresholds alone, only explained part of the empirically observed patterns of behavior.  
367 However, the full spectrum of observed phenomena could be qualitatively recapitulated by  
368 extending the model to incorporate heterogeneity in two additional factors: task performance

369 efficiency and task demand. Both are empirically documented (33–35, 45, 46) but theoretically  
370 rarely considered.

371

372 Between-type differences in threshold and in task efficiency alone—two sources of heterogeneity  
373 with opposing effects on behavioral organization—were sufficient to recapitulate the core of our  
374 empirical results. Between-type differences in threshold led to behavioral amplification, making  
375 ant types behaviorally more different when mixed than when separated, as is known from  
376 previous theoretical work on the FTM (26). In contrast, between-type differences in task  
377 efficiency led to behavioral contagion, making ant types behaviorally more similar when mixed  
378 than when separated. Our theoretical analysis suggests that the relative strengths of these two  
379 sources of heterogeneity might vary with colony composition. In our experiments, varying colony  
380 *morphological* composition produced behavioral patterns that were theoretically recapitulated  
381 under a relatively strong effect of between-type differences in threshold and a relatively weak  
382 effect of differences in efficiency. In contrast, the behavioral patterns observed under varied  
383 *genetic* composition matched the theoretical predictions for the case in which differences in  
384 efficiency have a relatively stronger effect. Manipulating *demographic* composition corresponded  
385 to an intermediate scenario in which the two opposing forces seemed to balance each other out.  
386 While both threshold (47–49) and efficiency (33–35) are known to vary with various individual  
387 traits in social insects, their relative contributions to age-, genotype- and morphology-based  
388 behavioral variation remain poorly understood and deserve further investigation.

389

390 A third source of heterogeneity, task demand, was necessary to recapitulate the asymmetry in  
391 behavioral contagion (i.e., whether workers in mixed colonies behaved more like one or the other  
392 type of workers in pure colonies). Empirically, whether a colony composed of two ant genotypes  
393 behaved more like one genotype or the other depended on the genotype of the larvae reared.  
394 Coupled with the theoretical analysis, these results suggest that the differences in brood genotype  
395 could be a source of differences in task demand. This points to the brood as an important player  
396 in the regulation of task allocation, at least for tasks associated with brood care, such as foraging  
397 and nursing (50). That the brood can influence colony-level traits has been shown in several  
398 social insects where larvae solicit food from workers via chemical (51–53) or behavioral (54, 55)  
399 cues that affect worker physiology (52, 56) and behavior (e.g., foraging (57), feeding (58)).  
400 However, the effect of larvae on the allocation of tasks across individual workers remains elusive  
401 in many social insects due to the challenges associated with measuring individual behavior in  
402 groups and precisely controlling brood demand. By taking advantage of automated tracking and

403 the unique biology of the clonal raider ant, our study overcomes these challenges and advances  
404 our understanding of larval factors that affect task allocation: we suggest that brood demand and  
405 its effects on task allocation depend not only on the presence and number of larvae (37, 59), but  
406 also on larval genotype. These results also provide insights into previous cross-fostering  
407 experiments that revealed that interactions between worker and brood genotypes have non-linear  
408 effects on brood development (into intercastes vs. regular workers) (38). Our work suggests that  
409 these effects might arise, at least in part, because different larval genotypes signal different levels  
410 of demand—and thereby differ in the magnitude of their effect on worker behavior—while  
411 different worker genotypes differ in their behavioral response to a given level of larval demand.  
412 For example, if different larval genotypes solicit food at different rates and different worker  
413 genotypes respond differently (e.g., via foraging thresholds or efficiency) to such differences in  
414 demand, the interaction between genetically-based larval demand and worker behavioral  
415 responses may result in differences in larval nutrition. Such differences may, in turn, lead to the  
416 previously reported shifts in larval development and, therefore, adult phenotype (38).

417  
418 Overall, these findings demonstrate that, despite its simplicity, the FTM has remarkable  
419 versatility in recapitulating a broad range of experimental outcomes, while still operating under  
420 biologically plausible assumptions. It is important to note, however, that while the behaviors  
421 observed are robust and generic—i.e., the parameters chosen to illustrate the versatility of the  
422 FTM are representative of large regions of parameter space—little is known about what  
423 parameter values might actually correspond to the different experimental types. Nevertheless,  
424 even in the absence of such experimental measurements, the model provides a useful starting  
425 point to generate testable predictions for increasingly complex colony compositions in the clonal  
426 raider ant and possibly other social insects.

427  
428 Our findings add to the growing literature on the role of individual heterogeneity in the collective  
429 behavior of complex biological (e.g., schools of fish, neurons in a brain, pathogen strains sharing  
430 a host, etc.) and artificial (e.g., heterogeneous robot swarms, synthetic microbial communities,  
431 etc.) systems. Much like colonies of the clonal raider ant, these systems exhibit patterns that can  
432 be interpreted as behavioral convergence (60–64), divergence (65), and non-linear effects of  
433 mixing on group-level phenotypes (66–68). In turn, these patterns affect important processes such  
434 as collective decision-making (5), the transmission and evolution of disease (69, 70), and the  
435 evolution of cooperative behavior (71, 72). While different variants of threshold-based models  
436 have been employed to study several of these systems (73–76), we still lack a unified theoretical

437 framework to understand the consequences of individual differences on collective dynamics (77).  
438 Thus, a comparative approach to the study of the basic organizing principles of heterogeneous  
439 systems across scales constitutes an important next step towards understanding the behavior of  
440 complex biological systems.

441

442

## 443 **Materials and Methods**

444

445 **Experimental design.** Four experiments were performed to investigate the effect of genetic  
446 composition (2 experiments differing in the brood genotype used), demographic composition (1  
447 experiment), and morphological composition (1 experiment). Each experiment comprised three  
448 treatments (2 with pure colonies, 1 with mixed colonies). All colonies within one experiment  
449 were monitored in parallel, but the different experiments were performed separately.

450

451 Experimental colonies were composed of workers of the desired age, genotype and morphology  
452 (Table S1), as well as larvae, housed in airtight Petri dishes 5 cm in diameter (corresponding to  
453 about 25 ant body-lengths) with a plaster of Paris floor. To control individual genotype, clonally  
454 related workers were sourced from the same stock colony. We used two commonly used  
455 genotypes, A and B (32, 38, 78). To control individual age, workers were sourced from a single  
456 age cohort from the same stock colony. Owing to the synchronized reproduction of *O. biroi*, all  
457 age-matched workers collected this way had eclosed within a day of each other. To control  
458 individual morphology, age-matched regular workers and intercastes from the same stock colony  
459 were screened based on body size (small or large) and the absence or presence of vestigial eyes,  
460 respectively. From the time they were collected (1–3 days after eclosion) until the start of  
461 experiments, workers of a given type were kept as a group. All workers were tagged with color  
462 marks on the thorax and gaster using oil-paint markers. Experimental colonies contained 16  
463 (genetic composition and demographic composition experiments) or 8 (morphological  
464 composition experiment) workers and a matching number of age-matched larvae (4-5 days old).  
465 This 1:1 larvae-to-workers ratio corresponds to the estimated ratio found in a typical laboratory  
466 stock colony in the brood-care phase. We used 8 (genetic composition and demographic  
467 composition experiments) or 16 (morphological composition experiment) replicate colonies were  
468 set up for each group composition, for a total of 120 colonies.

469

470 The experiments took place in a climate room at 25 °C and 75% relative humidity under constant  
471 light (*O. biroi* is blind and its behavior is not affected by light). Every 3 days, we cleaned and  
472 watered the plaster, and added one prey item (live pupae of fire ant minor workers) per live larva  
473 at a random location within the Petri dish.

474

475 Behavioral data acquisition and analyses were performed as in (32). Software for image analysis  
476 is available at <https://doi.org/10.5281/zenodo.1211644>.

477

478 **Behavioral data analyses.** *O. biroi* colonies switch between reproductive phases, in which all  
479 workers stay in the nest and lay eggs, and brood-care phases, in which workers nurse the larvae in  
480 the nest but also leave the nest to forage, explore, or dispose of waste. For each colony,  
481 behavioral analyses were restricted to the brood-care phase, which started at the beginning of the  
482 experiment and ended when all larvae had either reached the non-feeding pre-pupal stage or died.

483

484 The spatial distribution of each ant throughout the brood-care phase was quantified as the two-  
485 dimensional root-mean-square deviation:

486 
$$\text{r. m. s. d.} = \sqrt{\frac{\sum_i ((x_i - \bar{x})^2 + (y_i - \bar{y})^2)}{n}}$$

487 in which  $x_i$  and  $y_i$  are the coordinates of the focal ant in frame  $i$ , and  $\bar{x}$  and  $\bar{y}$  are the coordinates  
488 of the center of mass of the focal ant's overall spatial distribution in the brood-care phase, and  $n$   
489 is the number of frames in which the focal ant was detected. The r.m.s.d. is bounded between 0  
490 and  $r$ , the radius of the Petri dish. Workers that spend a lot of time at the nest with the brood (e.g.,  
491 nursing the larvae) and little time performing extranidal tasks (foraging or waste disposal) have  
492 low r.m.s.d. values, whereas workers that spend more time away from the brood have higher  
493 r.m.s.d. values.

494

495 For each colony, mean behavior was computed as the average of individual r.m.s.d. values, and  
496 behavioral variation was computed as the standard deviation of individual r.m.s.d. values. Both  
497 metrics were then averaged across replicate colonies for each treatment.

498

499 To quantify specialization, we use a metric appropriate for use on continuous behavioral data  
500 (r.m.s.d.). Specialization was defined for each colony as the Spearman correlation coefficient  
501 between individual r.m.s.d. ranks on consecutive days, averaged over the brood-care phase. Mean



502 rank-correlation coefficients were then compared across treatments. For all behavioral analyses,  
503 ants were excluded from the dataset if they were detected in less than 30% of the frames acquired  
504 within the considered time frame (brood-care phase or day); for ants that died during the brood-  
505 care phase, the considered time frame was the portion of the brood-care phase preceding death.

506

507 **Statistical analyses.** Statistical analyses were performed in R (79). Analyses were performed  
508 separately for each of the four experiments. As the experiments were performed at different times  
509 using different cohorts of ants, we cannot rule out “batch” effects and therefore avoid any  
510 statistical analyses comparing treatments across experiments.

511

512 *Effects of individual attributes traits on behavior.* The effects of colony composition (pure,  
513 mixed), individual attributes (genotypes A vs. B, Young vs. Old, or Regular worker vs.  
514 Intercaste), and their interaction, on individual behavior (individual r.m.s.d.) were investigated  
515 using linear mixed effects (LME, function *lmer* of package *lme4*) models with colony as a  
516 random factor. If a significant interaction between colony composition and individual attributes  
517 was detected, we used a second LME model with a four-level independent fixed variable  
518 combining colony composition and individual attributes ( $X_p$ ,  $Y_p$ ,  $X_m$  and  $Y_m$ , where  $X_k$  and  $Y_k$  are  
519 the mean behavior of ant types X and Y, respectively, in pure ( $k=p$ ) or mixed colonies ( $k=m$ )),  
520 followed by a Tukey posthoc test with Bonferroni-Holm correction (function *glht* of package  
521 *multcomp*) for the following planned comparisons:  $X_p$  vs.  $X_m$ ,  $Y_p$  vs.  $Y_m$ ,  $X_p$  vs.  $Y_p$ , and  $X_m$  vs.  
522  $Y_m$ . When needed, response variables were transformed to satisfy model assumptions.

523

524 *Effects of genetic, demographic, and morphological mixing on DOL.* The effects of the treatment  
525 (a 3-level variable: X, Y, and mixed) on division of labor (behavioral variation, specialization)  
526 were investigated using generalized linear models (GLM), followed by Tukey posthoc tests with  
527 Bonferroni-Holm correction for all three pairwise comparisons.

528

529 *Effects of genetic, demographic, and morphological mixing on individual behavior.* To assess  
530 whether type-specific behavior was affected by colony composition, we compared the difference  
531 in mean behavior (mean r.m.s.d.) between types across pure colonies to the difference in mean  
532 behavior between the same types within mixed colonies (i.e.,  $Y_p - X_p$  vs.  $Y_m - X_m$ , where  $Y_p > X_p$   
533 and  $Y_m > X_m$ ), using unpaired t-tests, after verifying assumptions of normality. We further tested  
534 whether the amplitude of the effect differed across types by comparing the magnitude of change

535 in type-specific behavior between pure and mixed colonies across the two ant types (i.e.  $|X_m - X_p|$   
 536  $\neq |Y_m - Y_p|$ ) with unpaired t-tests, after verifying assumptions of normality.

537

538 **Theoretical model.** The fixed threshold model (FTM) considers a colony of  $n$  individuals,  $N_X$  of  
 539 which are of type X and  $N_Y$  are of type Y ( $N_X + N_Y = n$ ). Types X and Y represent any pair of the  
 540 experimentally manipulated sub-colony compositions (i.e., genotypes A and B, Young and Old,  
 541 or Regular Workers and Intercastes). Without loss of generality, we assume that individuals 1, ...,  
 542  $N_X$  are of type X and individuals  $N_X + 1, \dots, n$  are of type Y. The colony must perform  $m$  tasks; for  
 543 consistency with the experimental approach, we assume that there are two tasks ( $m = 2$ ). At a  
 544 given time step, an individual can be either performing one of the  $m$  tasks (active) or not  
 545 performing any (inactive). The *task state* of individual  $i$  at time  $t$  is given by the binary variable  
 546  $x_{ij,t}$ : if individual  $i$  is active and performing task  $j$  at time  $t$ , then  $x_{ij,t} = 1$  and  $x_{ij',t} = 0$  for all  $j' \neq j$ ; if  
 547 individual  $i$  is inactive and in its rest state, then  $x_{ij,t} = 0$  for all  $j$ . The task state of the colony at  
 548 time  $t$  is then given by the  $n$ -by- $m$  binary matrix  $Q_t = [x_{ij,t}]$ .

549

550 The FTM further assumes that each task  $j$  has an associated *stimulus*  $s_{j,t}$ . This stimulus signals the  
 551 group-level demand for task  $j$  and changes depending on both the rate at which the demand  
 552 increases (e.g., the demand for foraging increases due to increased hunger in the colony) and the  
 553 number of individuals performing the task (e.g., the demand for foraging decreases as workers go  
 554 out and find food). Mathematically, the change in stimulus  $s_{j,t}$  is governed by Eq. (1):

$$555 \quad s_{j,t+1} = s_{j,t} + \delta_j - \frac{\alpha_j^X n_{j,t}^X + \alpha_j^Y n_{j,t}^Y}{n}, \quad (1)$$

556 where  $\delta_j$  is the task-specific demand rate, taken to be constant over time;  $\alpha_j^X$  and  $\alpha_j^Y$  are the task-  
 557 specific performance efficiency of type X and Y individuals, respectively; and  $n_{j,t}^X = \sum_{i=1}^{N_X} x_{ij,t}$  and  
 558  $n_{j,t}^Y = \sum_{i=N_X+1}^n x_{ij,t}$  are the numbers of type X and Y individuals performing task  $j$  at time  $t$ ,  
 559 respectively.

560

561 Each individual  $i$  is assumed to have an internal *threshold* for task  $j$ ,  $\theta_{ij}$ , drawn at time  $t = 0$  from a  
 562 normal distribution with mean  $\mu_j$  and normalized standard deviation  $\sigma_j$  (i.e., expressed as a  
 563 fraction of the corresponding mean  $\mu_j$ ). Although thresholds may change over the individuals'  
 564 lifetime, they are assumed to be fixed over the timescale of the experiments and, consequently,  
 565 over the simulation runs. We refer to  $\mu_j$  as the *mean task threshold* and to  $\sigma_j$  as the *threshold*  
 566 *variance* for task  $j$ ; each can be group- and/or task-specific (i.e.,  $\alpha_j^X, \alpha_j^Y, \sigma_j^X, \sigma_j^Y$ ).

567

568 At each time step, inactive individuals assess the  $m$  task stimuli in a random sequence until they  
569 either begin performing a task or have encountered all stimuli without landing on a task. For each  
570 encountered stimulus, individual  $i$  evaluates whether to perform the task by comparing the  
571 stimulus level to its internal threshold. Specifically, given stimulus  $s_{j,t}$  and internal threshold  $\theta_{ij}$ ,  
572 individual  $i$  commits to performing task  $j$  with probability

$$573 \quad P_{ij} = \frac{s_{ij}^{\eta}}{s_{ij}^{\eta} + \theta_{ij}^{\eta}}, \quad (2)$$

574 where parameter  $\eta$  governs the steepness of this response threshold function. The larger the value  
575 of  $\eta$ , the more deterministic the behavior; in the limit  $\eta \rightarrow \infty$ , the response function becomes a  
576 step function ( $H[s_{j,t} - \theta_{ij}] = 0$  if  $\theta_{ij} > s_{j,t}$ , 1 if  $\theta_{ij} < s_{j,t}$ ) where  $H$  is the Heaviside function). Active  
577 individuals spontaneously quit their task with a constant quit probability  $\tau$ . Active individuals can  
578 neither evaluate stimuli nor switch tasks without first quitting their current task.

579

580 Each agent-based simulation lasted  $T = 10,000$  time steps. All simulations and the subsequent  
581 analyses were conducted in R (79).

582

583

584

585 **Acknowledgments.** We thank A. Gal for advice on analyses, and O. Feinerman and M. Liu for  
586 contributions to the tracking algorithms. Research reported in this publication was supported by  
587 grants from the Faculty Scholars Program of the Howard Hughes Medical Institute, the Pew  
588 Biomedical Scholars Program, and the National Institute of General Medical Sciences of the  
589 National Institutes of Health under Award Number R35GM127007 (D.J.C.K.); Swiss National  
590 Science Foundation Advanced Postdoc Mobility (P300P3-147900) and Ambizione  
591 (PZ00P3\_168066) fellowships, and a Rockefeller University Women & Science fellowship  
592 (Y.U.); Army Research Office Grant W911NF-18-1-0325 (M.K.); National Science Foundation  
593 Graduate Research Fellowship no. DGE1656466 (C.K.T.); and a Kravis Fellowship (J.S.). The  
594 content is solely the responsibility of the authors and does not necessarily represent the official  
595 views of the National Institutes of Health, the Howard Hughes Medical Institute, or the Pew  
596 Biomedical Scholars Program. This is Clonal Raider Ant Project paper #13.

597 **References**

598

- 599 1. D. J. T. Sumpter, The principles of collective animal behaviour. *Philos. Trans. R. Soc. B*  
600 *Biol. Sci.* **361**, 5–22 (2006).
- 601 2. J. Werfel, K. Petersen, R. Nagpal, Designing collective behavior in a termite-inspired  
602 robot construction team. *Science* **343**, 754–758 (2014).
- 603 3. D. J. Cohen, W. James Nelson, M. M. Maharbiz, Galvanotactic control of collective cell  
604 migration in epithelial monolayers. *Nat. Mater.* **13**, 409–417 (2014).
- 605 4. C. D. Nadell, *et al.*, Cutting through the complexity of cell collectives. *Proc. R. Soc. B*  
606 *Biol. Sci.* **280**, 20122770 (2013).
- 607 5. A. J. Stewart, *et al.*, Information gerrymandering and undemocratic decisions. *Nature* **573**,  
608 117–121 (2019).
- 609 6. P. A. H. Westley, A. M. Berdahl, C. J. Torney, D. Biro, Collective movement in ecology:  
610 from emerging technologies to conservation and management. *Philos. Trans. R. Soc. B*  
611 *Biol. Sci.* **373**, 20170004 (2018).
- 612 7. D. M. Gordon, The organization of work in social insect colonies. *Nature* **380**, 121–124  
613 (1996).
- 614 8. T. D. Seeley, *et al.*, Stop signals provide cross inhibition in collective decision-making by  
615 honeybee swarms. *Science* **335**, 108–111 (2012).
- 616 9. A. Khuong, *et al.*, Stigmergic construction and topochemical information shape ant nest  
617 architecture. *Proc. Natl. Acad. Sci.* **113**, 1303–1308 (2016).
- 618 10. Z.-Y. Huang, G. E. Robinson, Regulation of honey bee division of labor by colony age  
619 demography. *Behav. Ecol. Sociobiol.* **39**, 147–158 (1996).
- 620 11. A. Brahma, S. Mandal, R. Gadagkar, Emergence of cooperation and division of labor in  
621 the primitively eusocial wasp *Ropalidia marginata*. *Proc. Natl. Acad. Sci.* **115**, 756–761  
622 (2018).
- 623 12. E. E. Greenwald, L. Baltiansky, O. Feinerman, Individual crop loads provide local control  
624 for collective food intake in ant colonies. *Elife* **7**, e31730 (2018).
- 625 13. S. N. Beshers, J. H. Fewell, Models of division of labor in social insects. *Annu. Rev.*  
626 *Entomol.* **46**, 413–440 (2001).
- 627 14. R. Jeanson, A. Weidenmüller, Interindividual variability in social insects - proximate  
628 causes and ultimate consequences. *Biol. Rev.* **89**, 671–687 (2014).
- 629 15. D. Naug, R. Gadagkar, The role of age in temporal polyethism in a primitively eusocial  
630 wasp. *Behav. Ecol. Sociobiol.* **42**, 37–47 (1998).
- 631 16. T. D. Seeley, Adaptive significance of the age polyethism schedule in honeybee colonies.  
632 *Behav. Ecol. Sociobiol.* **11**, 287–293 (1982).
- 633 17. F. Tripet, P. Nonacs, Foraging for work and age-based polyethism: the roles of age and  
634 previous experience on task choice in ants. *Ethology* **110**, 863–877 (2004).
- 635 18. B. Hinze, R. H. Leuthold, Age related polyethism and activity rhythms in the nest of the  
636 termite *Macrotermes bellicosus* (Isoptera, Termitidae). *Insectes Soc.* **46**, 392–397 (1999).
- 637 19. P.-A. Eyer, J. Freyer, S. Aron, Genetic polyethism in the polyandrous desert ant  
638 *Cataglyphis cursor*. *Behav. Ecol.* **24**, 144–151 (2012).
- 639 20. P. C. Frumhoff, J. Baker, A genetic component to division of labour within honey bee  
640 colonies. *Nature* **333**, 358–361 (1988).
- 641 21. R. Blatrix, J.-L. Durand, P. Jaisson, Task allocation depends on matriline in the ponerine  
642 ant *Gnamptogenys striatula* Mayr. *J. Insect Behav.* **13**, 553–562 (2000).
- 643 22. C. L. Kwapich, G. Valentini, B. Hölldobler, The non-additive effects of body size on nest  
644 architecture in a polymorphic ant. *Philos. Trans. R. Soc. B Biol. Sci.* **373**, 20170235  
645 (2018).
- 646 23. J. Wetterer, The ecology and evolution of worker size-distribution in leaf-cutting ants  
647 (Hymenoptera: Formicidae). *Sociobiology* **34**, 119–144 (1999).

- 648 24. G. B. Blanchard, G. M. Orledge, S. E. Reynolds, N. R. Franks, Division of labour and  
649 seasonality in the ant *Leptothorax albipennis*: worker corpulence and its influence on  
650 behaviour. *Anim. Behav.* **59**, 723–738 (2000).
- 651 25. G. Robinson, Regulation of division of labor in insect societies. *Annu. Rev. Entomol.* **37**,  
652 637–665 (1992).
- 653 26. E. Bonabeau, G. Theraulaz, J. L. Deneubourg, Quantitative study of the fixed threshold  
654 model for the regulation of division of labour in insect societies. *Proc. R. Soc. B Biol. Sci.*  
655 **263**, 1565–1569 (1996).
- 656 27. E. Bonabeau, G. Theraulaz, J.-L. L. Deneubourg, Fixed response thresholds and the  
657 regulation of division of labor in insect societies. *Bull. Math. Biol.* **60**, 753–807 (1998).
- 658 28. M. R. Myerscough, B. P. Oldroyd, Simulation models of the role of genetic variability in  
659 social insect task allocation. *Insectes Soc.* **51**, 146–152 (2004).
- 660 29. J. Gautrais, G. Theraulaz, J. L. Deneubourg, C. Anderson, Emergent polyethism as a  
661 consequence of increased colony size in insect societies. *J. Theor. Biol.* **215**, 363–373  
662 (2002).
- 663 30. G. E. Robinson, R. E. Page, “Genetic basis for division of labor in an insect society” in  
664 *The Genetics of Social Evolution*, M. D. Breed, R. E. Page, Eds. (Westview Press, 1989),  
665 pp. 61–80.
- 666 31. M. Waibel, D. Floreano, S. Magnenat, L. Keller, Division of labour and colony efficiency  
667 in social insects: effects of interactions between genetic architecture, colony kin structure  
668 and rate of perturbations. *Proc. R. Soc. B Biol. Sci.* **273**, 1815–1823 (2006).
- 669 32. Y. Ulrich, J. Saragosti, C. K. Tokita, C. E. Tarnita, D. J. C. Kronauer, Fitness benefits and  
670 emergent division of labor at the onset of group-living. *Nature* **560**, 635–638 (2018).
- 671 33. E. O. Wilson, Caste and division of labor in leaf-cutter ants (Hymenoptera: Formicidae:  
672 *Atta*). *Behav. Ecol. Sociobiol.* **7**, 157–165 (1980).
- 673 34. A. Kay, S. W. Rissing, Division of foraging labor in ants can mediate demands for food  
674 and safety. *Behav. Ecol. Sociobiol.* **58**, 165–174 (2005).
- 675 35. A. L. Mertl, J. F. A. Traniello, Behavioral evolution in the major worker subcaste of twig-  
676 nesting *Pheidole* (Hymenoptera: Formicidae): does morphological specialization influence  
677 task plasticity? *Behav. Ecol. Sociobiol.* **63**, 1411–1426 (2009).
- 678 36. A. Weidenmüller, The control of nest climate in bumblebee (*Bombus terrestris*) colonies:  
679 interindividual variability and self reinforcement in fanning response. *Behav. Ecol.* **15**,  
680 120–128 (2004).
- 681 37. Y. Ulrich, D. Burns, R. Libbrecht, D. J. C. Kronauer, Ant larvae regulate worker foraging  
682 behavior and ovarian activity in a dose-dependent manner. *Behav. Ecol. Sociobiol.* **70**,  
683 1011–1018 (2016).
- 684 38. S. Teseo, N. Châline, P. Jaisson, D. J. C. Kronauer, Epistasis between adults and larvae  
685 underlies caste fate and fitness in a clonal ant. *Nat. Commun.* **5**, 3363 (2014).
- 686 39. R. Jeanson, J. H. Fewell, R. Gorelick, S. M. Bertram, Emergence of increased division of  
687 labor as a function of group size. *Behav. Ecol. Sociobiol.* **62**, 289–298 (2007).
- 688 40. F. Ravary, P. Jaisson, Absence of individual sterility in thelytokous colonies of the ant  
689 *Cerapachys biroi* Forel (Formicidae, Cerapachyinae). *Insectes Soc.* **51**, 67–73 (2004).
- 690 41. D. J. C. Kronauer, N. E. Pierce, L. Keller, Asexual reproduction in introduced and native  
691 populations of the ant *Cerapachys biroi*. *Mol. Ecol.* **21**, 5221–5235 (2012).
- 692 42. P. H. W. Biedermann, M. Taborsky, Larval helpers and age polyethism in ambrosia  
693 beetles. *Proc. Natl. Acad. Sci.* **108**, 17064–17069 (2011).
- 694 43. F. Ito, S. Higashi, A linear dominance hierarchy regulating reproduction and polyethism  
695 of the queenless ant *Pachycondyla sublaevis*. *Naturwissenschaften* **78**, 80–82 (1991).
- 696 44. A. Bernadou, *et al.*, Stress and early experience underlie dominance status and division of  
697 labour in a clonal insect. *Proc. R. Soc. B Biol. Sci.* **285**, 20181468 (2018).
- 698 45. M. Beekman, J. N. M. Calis, W. J. Boot, Parasitic honeybees get royal treatment. *Nature*



- 699           **404**, 723 (2000).
- 700   46.   A. Dornhaus, Specialization does not predict individual efficiency in an ant. *PLoS Biol.* **6**,
- 701           2368–2375 (2008).
- 702   47.   C. Detrain, J. M. Pasteels, Caste differences in behavioral thresholds as a basis for
- 703           polyethism during food recruitment in the ant, *Pheidole pallidula* (Nyl.) (Hymenoptera:
- 704           Myrmicinae). *J. Insect Behav.* **4**, 157–176 (1991).
- 705   48.   T. Pankiw, R. E. Page Jr., The effect of genotype, age, sex, and caste on response
- 706           thresholds to sucrose and foraging behavior of honey bees (*Apis mellifera* L.). *J. Comp.*
- 707           *Physiol. A* **185**, 207–213 (1999).
- 708   49.   T. Pankiw, R. E. Page Jr, Response thresholds to sucrose predict foraging division of labor
- 709           in honeybees. *Behav. Ecol. Sociobiol.* **47**, 265–267 (2000).
- 710   50.   D. J. C. Kronauer, R. Libbrecht, Back to the roots: the importance of using simple insect
- 711           societies to understand the molecular basis of complex social life. *Curr. Opin. Insect Sci.*
- 712           **28**, 33–39 (2018).
- 713   51.   Y. Le Conte, G. Arnold, J. Trouiller, C. Masson, B. Chappe, Identification of a brood
- 714           pheromone in honeybees. *Naturwissenschaften* **77**, 334–336 (1990).
- 715   52.   A. Maisonnasse, *et al.*, A scientific note on E- $\beta$ -ocimene, a new volatile primer
- 716           pheromone that inhibits worker ovary development in honey bees. *Apidologie* **40**, 562–
- 717           564 (2009).
- 718   53.   F. Mas, M. Kölliker, Maternal care and offspring begging in social insects: chemical
- 719           signalling, hormonal regulation and evolution. *Anim. Behav.* **76**, 1121–1131 (2008).
- 720   54.   N. Kaptein, J. Billen, B. Gobin, Larval begging for food enhances reproductive options in
- 721           the ponerine ant *Gnamptogenys striatula*. *Anim. Behav.* **69**, 293–299 (2005).
- 722   55.   K. Kawatsu, Effect of nutritional condition on larval food requisition behavior in a
- 723           subterranean termite *Reticulitermes speratus* (Isoptera: Rhinotermitidae). *J. Ethol.* **31**, 17–
- 724           22 (2013).
- 725   56.   B. Oldroyd, T. Wossler, F. Ratnieks, Regulation of ovary activation in worker honey-bees
- 726           (*Apis mellifera*): larval signal production and adult response thresholds differ between
- 727           anarchistic and wild-type bees. *Behav. Ecol. Sociobiol.* **50**, 366–370 (2001).
- 728   57.   T. Pankiw, R. E. Page Jr, M. Kim Fondrk, Brood pheromone stimulates pollen foraging in
- 729           honey bees (*Apis mellifera*). *Behav. Ecol. Sociobiol.* **44**, 193–198 (1998).
- 730   58.   Y. Le Conte, L. Sreng, S. H. Poitout, Brood pheromone can modulate the feeding behavior
- 731           of *Apis mellifera* workers (Hymenoptera: Apidae). *J. Econ. Entomol.* **88**, 798–804 (1995).
- 732   59.   F. Ravary, B. Jahyny, P. Jaisson, Brood stimulation controls the phasic reproductive cycle
- 733           of the parthenogenetic ant *Cerapachys biroi*. *Insectes Soc.* **53**, 20–26 (2006).
- 734   60.   N. A. Christakis, J. H. Fowler, The spread of obesity in a large social network over 32
- 735           years. *N. Engl. J. Med.* **357**, 370–379 (2007).
- 736   61.   A. Berdahl, C. J. Torney, C. C. Ioannou, J. J. Faria, I. D. Couzin, Emergent sensing of
- 737           complex environments by mobile animal groups. *Science* **339**, 574–576 (2013).
- 738   62.   E. van de Waal, C. Borgeaud, A. Whiten, Potent social learning and conformity shape a
- 739           wild primate’s foraging decisions. *Science* **340**, 483 LP – 485 (2013).
- 740   63.   P. Broly, J.-L. Deneubourg, Behavioural contagion explains group cohesion in a social
- 741           crustacean. *PLOS Comput. Biol.* **11**, 1–18 (2015).
- 742   64.   D. Centola, *How Behavior Spreads: The Science of Complex Contagions* (Princeton
- 743           University Press, 2018).
- 744   65.   V. Bettenworth, *et al.*, Phenotypic heterogeneity in bacterial quorum sensing systems. *J.*
- 745           *Mol. Biol.* **431**, 4530–4546 (2019).
- 746   66.   S. Kaushik, B. Katoch, V. Nanjundiah, Social behaviour in genetically heterogeneous
- 747           groups of *Dictyostelium giganteum*. *Behav. Ecol. Sociobiol.* **59**, 521–530 (2006).
- 748   67.   N. J. Buttery, C. R. L. Thompson, J. B. Wolf, Complex genotype interactions influence
- 749           social fitness during the developmental phase of the social amoeba *Dictyostelium*

- 750 *discoideum*. *J. Evol. Biol.* **23**, 1664–1671 (2010).
- 751 68. S. Pande, G. J. Velicer, Chimeric synergy in natural social groups of a cooperative  
752 microbe. *Curr. Biol.* **28**, 262–267 (2018).
- 753 69. A. S. Bell, J. C. De. Roode, D. Sim, A. F. Read, Within-host competition in genetically  
754 diverse malaria infections: parasite virulence and competitive success. *Evolution* **60**,  
755 1358–1371 (2006).
- 756 70. A. F. Read, L. H. Taylor, The ecology of genetically diverse infections. *Science* **292**,  
757 1099–1102 (2001).
- 758 71. J. E. Strassmann, Y. Zhu, D. C. Queller, Altruism and social cheating in the social amoeba  
759 *Dictyostelium discoideum*. *Nature* **408**, 965–967 (2000).
- 760 72. S. P. Diggle, A. S. Griffin, G. S. Campbell, S. A. West, Cooperation and conflict in  
761 quorum-sensing bacterial populations. *Nature* **450**, 411–414 (2007).
- 762 73. J. J. Hopfield, Neural networks and physical systems with emergent collective  
763 computational abilities. *Proc. Natl. Acad. Sci.* **79**, 2554–2558 (1982).
- 764 74. P. S. Dodds, D. J. Watts, A generalized model of social and biological contagion. *J.*  
765 *Theor. Biol.* **232**, 587–604 (2005).
- 766 75. A. J. W. Ward, D. J. T. Sumpter, I. D. Couzin, P. J. B. Hart, J. Krause, Quorum decision-  
767 making facilitates information transfer in fish shoals. *Proc. Natl. Acad. Sci.* **105**, 6948–  
768 6953 (2008).
- 769 76. P. Melke, P. Sahlin, A. Levchenko, H. Jönsson, A cell-based model for quorum sensing in  
770 heterogeneous bacterial colonies. *PLOS Comput. Biol.* **6**, 1–12 (2010).
- 771 77. J. W. Jolles, A. J. King, S. S. Killen, The role of individual heterogeneity in collective  
772 animal behaviour. *Trends Ecol. Evol.* **35**, 278–291 (2020).
- 773 78. P. R. Oxley, *et al.*, The genome of the clonal raider ant *Cerapachys biroi*. *Curr. Biol.* **24**,  
774 451–458 (2014).
- 775 79. R Core Team, *R: A Language and Environment for Statistical Computing* (R Foundation  
776 for Statistical Computing, 2019).
- 777



778 **Figures and Tables**

779

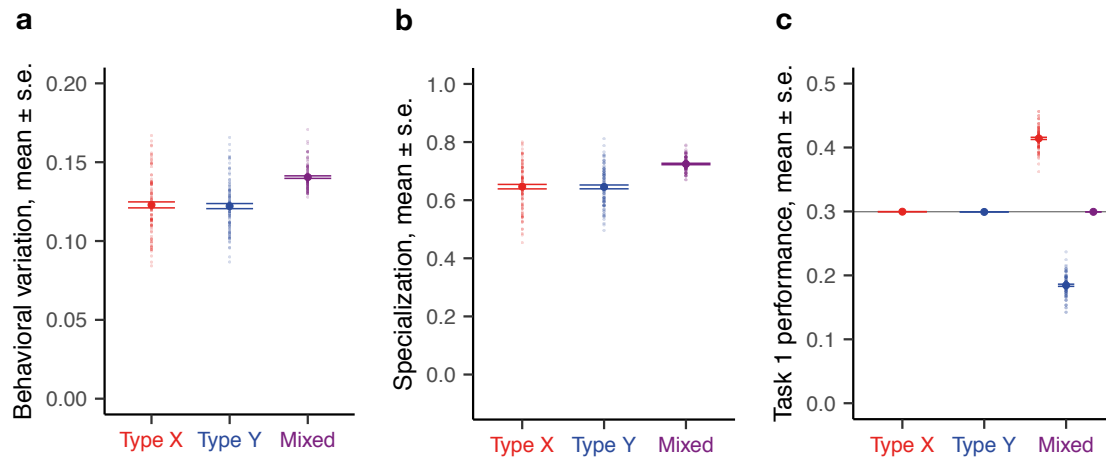

780

781 **Figure 1. Theoretical predictions of the simple FTM with differences in mean task thresholds only.**

782 One hundred replicates were simulated for each colony composition. Each opaque circle represents an  
783 individual replicate colony (colony size 16); each solid circle represents the average value across all  
784 replicates for its corresponding colony (or sub-colony) composition. Panels show division of labor  
785 (behavioral variation (a), specialization (b)) and task performance frequency (c) as a function of colony  
786 composition. Type Y individuals have a higher mean threshold than type X individuals for both tasks ( $\mu^X =$   
787  $10, \mu^Y = 20$ ). All other parameters are identical for both types:  $\delta = 0.6, \alpha = 2, \sigma = 0.1, \eta = 7, \tau = 0.2$  (see  
788 Materials and Methods and Table S2 for parameter definitions).

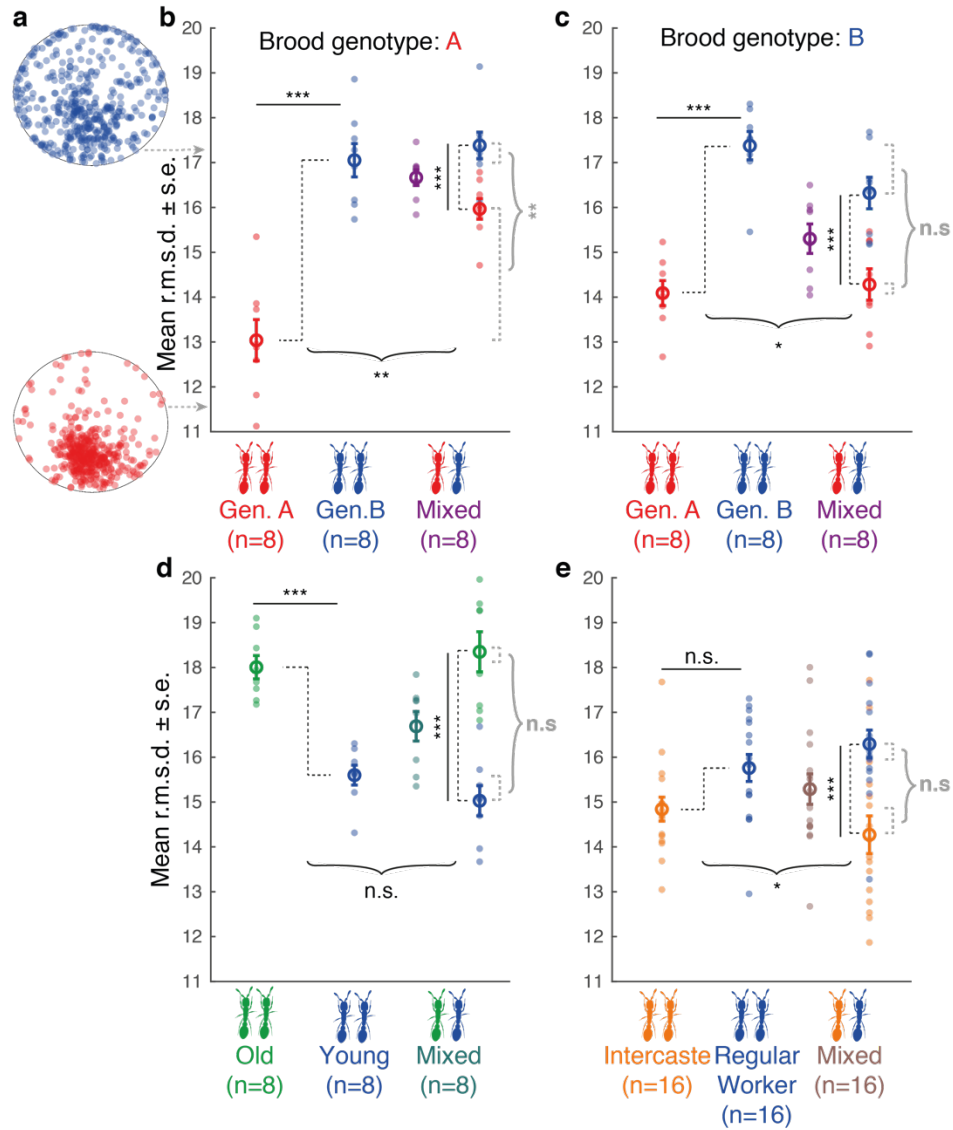

789

790 **Figure 2. Mean r.m.s.d. (a proxy for mean extranidal activity) as a function of colony composition.**

791 Opaque circles represent mean behavior of individuals in replicate colonies (or sub-colonies). Open circles  
 792 represent average values across replicate colonies (or sub-colonies). For mixed colonies, data are shown  
 793 both as type-specific mean behavior (in type-specific colors) and colony-level mean behavior (in ‘average’  
 794 color). Identical colors across panels indicate ants of the same genotype, age, and morphological types.  
 795 Sample sizes indicate the number of replicate colonies. Straight solid black brackets represent the effects of  
 796 individual traits on behavior ( $X_p$  vs.  $Y_p$  and  $X_m$  vs.  $Y_m$ ). Black dotted brackets represent the behavioral  
 797 differences between types in pure ( $Y_p - X_p$ ) and mixed ( $Y_m - X_m$ ) colonies. Black curly brackets represent the  
 798 effect of mixing on inter-type behavioral differences ( $Y_p - X_p$  vs.  $Y_m - X_m$ ). Grey curly brackets represent the  
 799 asymmetry of the effect of mixing between types ( $|X_p - X_m|$  vs.  $|Y_p - Y_m|$ ). **a**: Spatial distribution of two ants  
 800 with high (blue; genotype B) and low (red; genotype A) r.m.s.d. from the same colony. Arrows point to the  
 801 corresponding r.m.s.d. values. **b**: Behavior as a function of colony genetic composition in colonies with A

802 brood. Colony size 16. GLMM post hoc Tukey tests ( $B_p$  vs.  $A_p$ :  $z = 7.75$ ,  $p = 3.64 \times 10^{-14}$ ;  $B_m$  vs.  $A_m$ :  $z =$   
803  $4.61$ ,  $p = 8.06 \times 10^{-06}$ ) **c:** Behavior as a function of colony genetic composition in colonies with B brood.  
804 Colony size 16. ( $B_p$  vs.  $A_p$ :  $z = 7.45$ ,  $p = 2.80 \times 10^{-13}$ ;  $B_m$  vs.  $A_m$ :  $z = 7.68$ ,  $p = 6.57 \times 10^{-14}$ ) **d:** Behavior as a  
805 function of colony demographic composition. Colony size 16 ( $Young_p$  vs.  $Old_p$ :  $z = -6.05$ ,  $p = 4.39 \times 10^{-09}$ ;  
806  $Young_m$  vs.  $Old_m$ :  $z = -13.31$ ,  $p < 2 \times 10^{-16}$ ). **e:** Behavior as a function of colony morphological composition.  
807 Colony size 8. ( $Regular\ Worker_p$  vs.  $Intercaste_p$ :  $z = 2.14$ ,  $p = 0.10$ ,  $Regular\ Worker_m$  vs.  $Intercaste_m$ :  $z =$   
808  $8.95$ ,  $p < 2 \times 10^{-16}$ ). n.s.: non-significant, \*:  $p < 0.05$ , \*\*:  $p < 0.01$ , \*\*\*:  $p < 0.001$ .

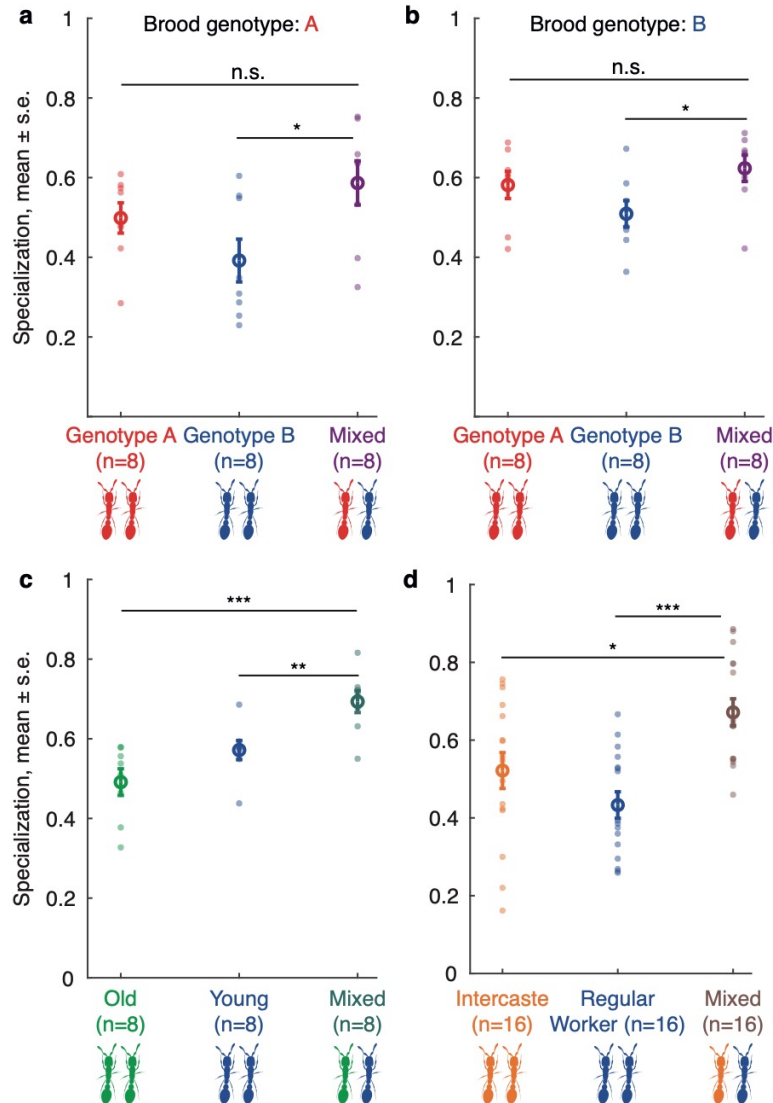

809

810 **Figure 3. Specialization (day-to-day rank correlation in r.m.s.d.) as a function of colony**

811 **composition.** Opaque circles represent replicate colonies. Open circles represent average values across

812 replicate colonies. Sample sizes indicate the number of replicate colonies. Identical colors across panels

813 indicate ants of the same genotype, age, and morphological types. **a:** Specialization as a function of colony

814 genetic composition in colonies with A brood. Colony size 16. (GLM post hoc Tukey tests;  $B_p$  vs. mixed:  $z$

815 = -2.78,  $p = 0.02$ ;  $A_p$  vs. mixed:  $z = 1.25$ ,  $p = 0.26$ ) **b:** Specialization as a function of colony genetic

816 composition in colonies with B brood. Colony size 16. ( $B_p$  vs. mixed:  $z = -2.41$ ,  $p = 0.047$ ;  $A_p$  vs. mixed:  $z$

817 = 0.88,  $p = 0.38$ ) **c:** Specialization as a function of colony demographic composition. Colony size 16

818 (Young<sub>p</sub> vs. mixed:  $z = 3.01$ ,  $p = 0.005$ ; Old<sub>p</sub> vs. mixed:  $z = 5.01$ ,  $p = 1.63 \times 10^{-6}$ ) **d:** Specialization as a

819 function of colony morphological composition. Colony size 8 (Regular Worker<sub>p</sub> vs. mixed:  $z = -4.35$ ,  $p =$

820  $4.05 \times 10^{-5}$ , Intercaste<sub>p</sub> vs. mixed:  $z = 2.73$ ,  $p = 0.013$ ). n.s.: non-significant, \*:  $p < 0.05$ , \*\*:  $p < 0.01$ , \*\*\*:  $p$

821  $< 0.001$ .

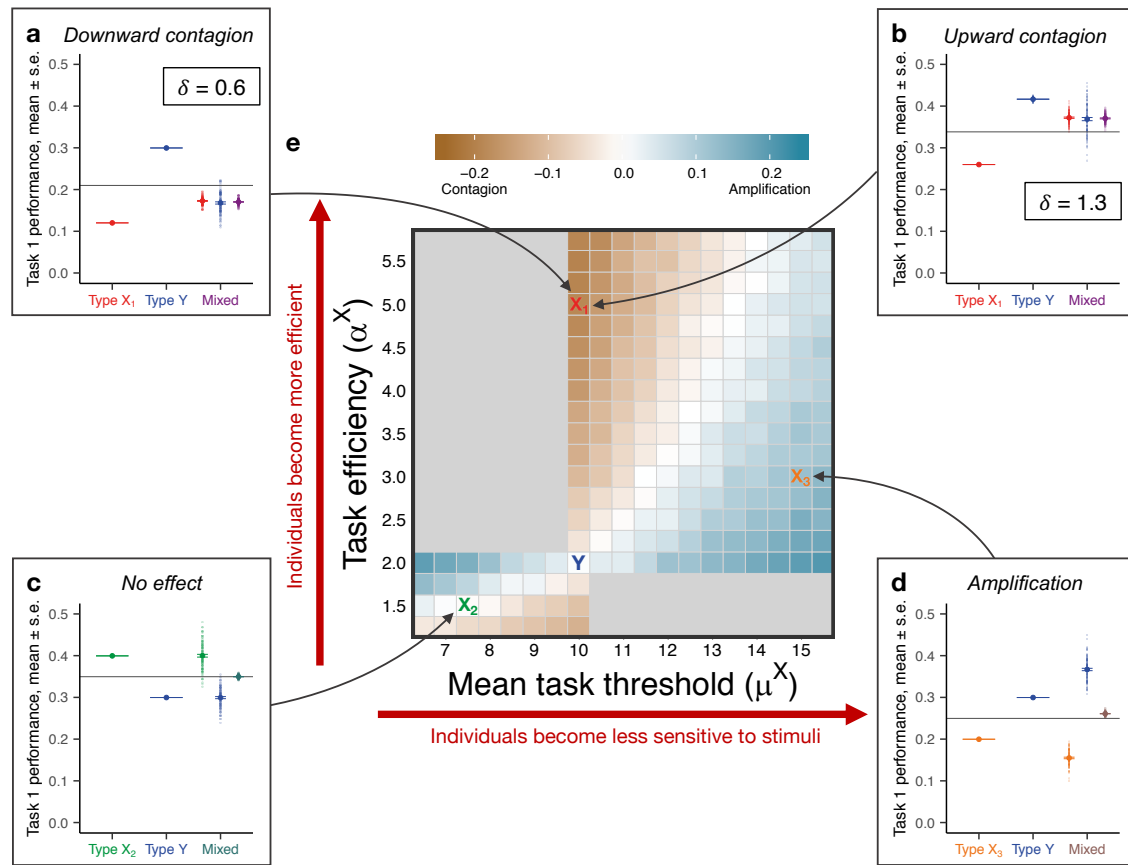

822

823

**Figure 4. Theoretical predictions of the FTM on task performance and their robustness. a-d:** Task

824

performance frequency as a function of colony composition. One hundred replicates were simulated for

825

each colony composition. Each opaque circle represents a replicate colony (colony size 16); each solid

826

circle represents the average value across all replicates for its corresponding colony (or sub-colony)

827

composition. Horizontal gray lines represent the average value of the pure colonies (first two columns) in

828

their respective panels. Identical colors across panels indicate ants of the same types; in particular, the

829

parameters for type Y ants are fixed across panels **a-d** ( $\mu^Y = 10$ ,  $\alpha^Y = 2$ ). **a-b:** Differences in task efficiency

830

( $\alpha$ ) between types and demand rate ( $\delta$ ) across colonies capture asymmetric behavioral contagion, downward

831

(**a**) and upward (**b**). Larvae are more demanding in **b** ( $\delta = 1.3$ ) than in **a** ( $\delta = 0.6$ ). For a given  $\delta$ , type  $X_1$  is

832

more efficient than type Y ( $\alpha^{X_1} = 5$ ,  $\alpha^Y = 2$ ). Type Y can keep up with demand when the larvae are less

833

demanding (**a**) but not when they are more demanding (**b**); type  $X_1$  can keep up with the demand in both

834

cases. Parameters:  $\sigma = 0.1$ ,  $\mu = 10$ ,  $\eta = 7$ ,  $\tau = 0.2$ . **c-d:** Between-type differences in task efficiency ( $\alpha$ ) and

835

mean threshold ( $\mu$ ) capture both a lack of effects from mixing (**c**) and behavioral amplification (**d**). In **c**,

836

type  $X_2$  is less efficient than type Y ( $\alpha^{X_2} = 1.5$ ,  $\alpha^Y = 2$ ) and has a lower threshold for both tasks ( $\mu^{X_2} = 7.5$ ,  $\mu^Y$

837

$= 10$ ). In **d**, type  $X_3$  is more efficient than type Y ( $\alpha^{X_3} = 3$ ,  $\alpha^Y = 2$ ) and has a higher threshold for both tasks

838

( $\mu^{X_3} = 15$ ,  $\mu^Y = 10$ ). Parameters:  $\sigma = 0.1$ ,  $\eta = 7$ ,  $\delta = 0.6$ ,  $\tau = 0.2$ . **e:** Change in between-type relative task

839

performance between mixed and pure colonies (measured as  $(Y_m - X_m) - (Y_p - X_p)$ ) as a function of type X's

840 task efficiency,  $\alpha^X$ , and mean task threshold,  $\mu^X$ . The letters  $X_1$ ,  $X_2$ , and  $X_3$  indicate the parameter settings  
841 for type X in **a-d**; the blue letter Y indicates the parameter settings for type Y, which are fixed for **a-d** and  
842 all grids in **e**. Shades of blue indicate behavioral amplification ( $Y_p - X_p < Y_m - X_m$ ), and shades of brown  
843 indicate behavioral contagion ( $Y_p - X_p > Y_m - X_m$ ); light gray indicates regions in which the behavior is  
844 undefined according to our definitions of the behavioral patterns, which exclude biologically unrealistic  
845 scenarios (see Results). Fifty replicates were simulated for each parameter combination. Parameters:  $\eta = 7$ ,  
846  $\sigma = 0.1$ ,  $\tau = 0.2$ .

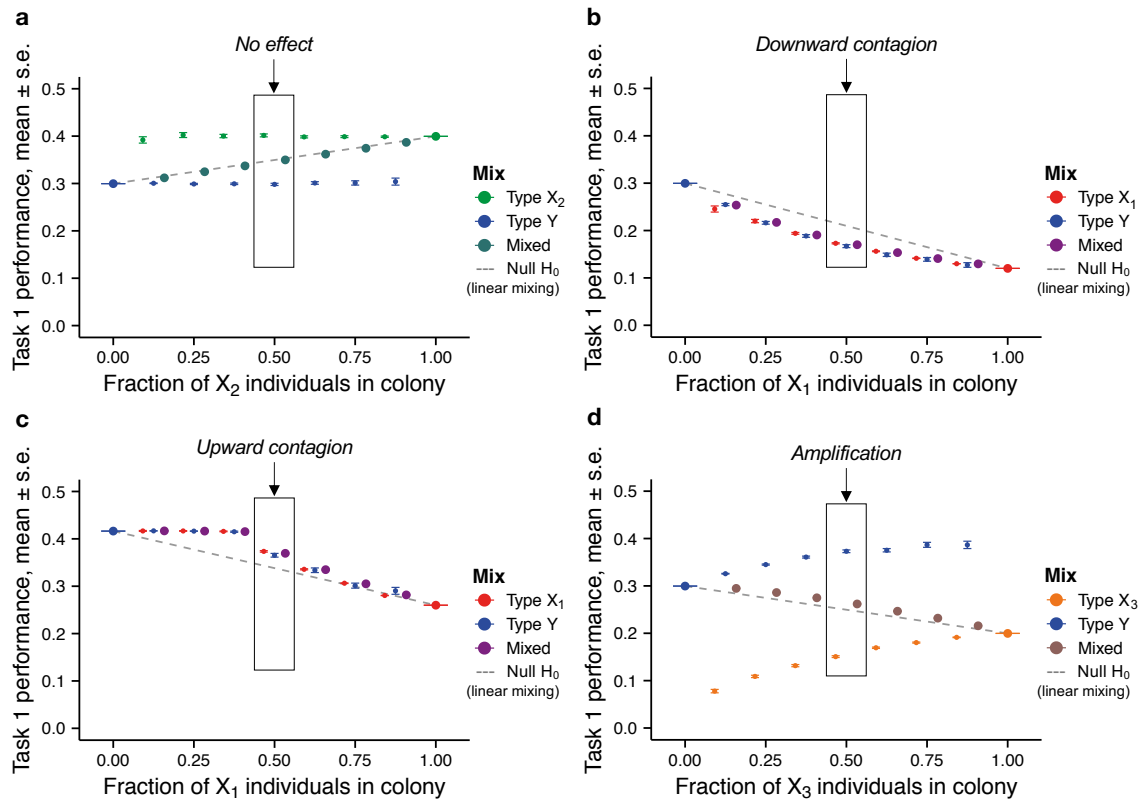

847

848 **Figure 5. Predictions of the FTM for non-1:1 mixes.** Colonies of size 16 with varying ratios of X and Y  
849 individuals were simulated under different conditions of threshold values, task-performance efficiency, and  
850 task demand. One hundred replicates were simulated for each colony composition. Each large circle  
851 represents the mean for that mix of X and Y individuals, while the neighboring smaller circles represent the  
852 means of X and Y individuals, respectively, within that mix. The dashed lines indicate the null hypothesis  
853 of linear behavioral effects of mixing types. The boxes highlight the behavioral patterns that characterize  
854 the 1:1-mixes, and their labels indicate correspondence with panels in Fig. 4 (a with Fig. 4c, b with Fig. 4a,  
855 c with Fig. 4b, and d with Fig. 4d). Parameters for each type (X<sub>1</sub>, X<sub>2</sub>, X<sub>3</sub>, Y) are identical to those of the  
856 corresponding type in Fig. 4. **a:** X<sub>2</sub> individuals have a lower mean task threshold and are less efficient than  
857 Y individuals. **b:** X<sub>1</sub> individuals are more efficient than Y individuals. **c:** X<sub>1</sub> individuals are more efficient  
858 than Y individuals, but task demand is high. **d:** X<sub>3</sub> individuals have a much higher mean task threshold than  
859 Y individuals and are more efficient.



860 **Table 1. Summary of theoretical results.** Theoretical predictions of the simple FTM (top row) and  
 861 extended FTM (bottom row) for pure and mixed colonies, as well as the pattern of behavioral change  
 862 observed between them. Text in italic highlights key differences in model predictions. Colors indicate  
 863 agreement (light green) or disagreement (light red) with experiments.

|                                     |                                                                        | Pure colonies                                                |                         | Mixed colonies                           |                                       | Behavioral change from pure to mixed colonies               |
|-------------------------------------|------------------------------------------------------------------------|--------------------------------------------------------------|-------------------------|------------------------------------------|---------------------------------------|-------------------------------------------------------------|
|                                     |                                                                        | Mean task performance                                        | Division of labor (DOL) | Mean task performance                    | Division of labor (DOL)               |                                                             |
| Type of Fixed Threshold Model (FTM) | Simple FTM<br>(with variation in mean response threshold only)         | <i>Identical</i> across colonies of different ant types (P1) | Exhibits DOL            | <i>Identical</i> to pure colonies (P1)   | Higher DOL than in pure colonies (P2) | Behavioral <i>amplification only</i> (P3)                   |
|                                     | Extended FTM<br>(with variation in other biologically relevant params) | <i>Different</i> across colonies of different ant types (P4) | Exhibits DOL            | <i>Different</i> from pure colonies (P4) | Higher DOL than in pure colonies (P2) | Behavioral <i>contagion, amplification, or neither</i> (P5) |

 = experiments **agree** with prediction  
 = experiments **disagree** with prediction

864
